# Supplementary material
Source: PubMed Central journal article supplement (PMC2823521)
Supplement: supp_M109.065995_jbc.M109.065995-1.pdf [file supp_M109.065995_jbc.M109.065995-1.pdf]

**Supplementary Table 1**

| Name                    | Gene   | Sequence                                                                 |
|-------------------------|--------|--------------------------------------------------------------------------|
| FB-1F                   | Fbxl14 | 5'-AACGGATCCACCATGGAGACCCACATCTCATGC-3'                                  |
| FB-1R                   | Fbxl14 | 5'-CAAGATATCCCCTTCTGGAGCTTCCC-3'                                         |
| FB-2F( $\Delta$ F)      | Fbxl14 | 5'-AACGGATCCACCATGGAGGCCAAGCTGCACCTGCGC-3'                               |
| FB-3F                   | Fbxl14 | 5'-ATGGCATCAACCGCATGGTGC-3'                                              |
| FB-3R                   | Fbxl14 | 5'-CCTTCTCACTGTCCGTCATCTGCC-3'                                           |
| FB-4F                   | FBXL14 | 5'-GGCTGCACCCGAATCACCAAG-3'                                              |
| FB-4R                   | FBXL14 | 5'-TCCCCTCGTGCCTCCTTCTCAC-3'                                             |
| FB-si-1F<br>(637-659)   | FBXL14 | 5'-GATCCCCGAAGCTCACAGATCTTTCTTTCAAGAGAAGAAAG<br>ATCTGTGAGCTTCTTTTTC-3'   |
| FB-si-1R<br>(637-659)   | FBXL14 | 5'-TCGAGAAAAAGAAGCTCACAGATCTTTCTTCTTTGAAAGA<br>AAGATCTGTGAGCTTCGGG-3'    |
| FB-si-2F<br>(880-902)   | FBXL14 | 5'-GAT CCCCCAGAGTCTGG<br>CTTACATATTCAAGAGATATGTAAGCCAGACTCTGGTTTTTTC-3'  |
| FB-si-2R<br>(880-902)   | FBXL14 | 5'-TCGAGAAAAACCAGAGTCTGGCTTACATATCTCTTGAATA<br>TGTAAGCCAGACTCTGGGGG-3'   |
| FB-si-3F<br>(999-1021)  | FBXL14 | 5'-GATCCCCCGCTCAACATTGGACAG TGTTC AAGAGACT<br>GTCCAATGTTGAGCGTTTTTTC-3'  |
| FB-si-3R<br>(999-1021)  | FBXL14 | 5'-TCGAGAAAAACGCTC AACATTGGACAGTGTCTCTTGAACA<br>CTGTCCAATGTTGAGCGGGG-3'  |
| FB-si-4F<br>(scrambled) |        | 5'-GATCCCCGCCAGCTGGAGCACTGTAATTC AAGAGATTACA<br>GTGCTCCAGCTGGCTT TTTC-3' |
| FB-si-4R<br>(scrambled) |        | 5'-TCGAGAAAAAAGCCAGCTGGAGCACTGTAATCTCTTGAA<br>TTACAGTGCTCCAGCTGGCGGG-3'  |
| TW-3F                   | TWIST1 | 5'-CATGTCCGCGTCCCAGTAG-3'                                                |
| TW-3R                   | TWIST1 | 5'-TGTCATTTTCTCCTTCTCTGG-3'                                              |
| K9R-1F                  | Snail1 | 5'-CCTTCTGGTCAGGAGGCCGTCCGAC-3'                                          |
| K9R-1R                  | Snail1 | 5'-GTCGGACGGCCTCC TGACCAGGAAGG-3'                                        |
| K16R-1F                 | Snail1 | 5'-CGACCCCCGCCGAGGCCCAACTATAGC-3'                                        |
| K16R-1R                 | Snail1 | 5'-GCTATAGTTGGGCCTCCGGCGGGGGTCCG-3'                                      |
| K98R-1F                 | Snail1 | 5'-CCGATGAGGACAGTG GCAGAAGCTCCAGCCGCCAGC-3'                              |
| K98R-1R                 | Snail1 | 5'-GCTGGGCGGCTGGGAGCTTCTGCCACTGTCTCATCGG-3'                              |
| K137R-1F                | Snail1 | 5'-GGGCCAACTTCCCAGGCAGCTG-3'                                             |
| K137R-1R                | Snail1 | 5'-CAGCTGCCTGGGAAGTTGGCCC-3'                                             |
| K146R-1F                | Snail1 | 5'-CTCTCGGTGGCCAGGGACCCCCAGTCG-3'                                        |
| K146R-1R                | Snail1 | 5'-CGACTGGGGGTCCCTGGCCACCGAGAG-3'                                        |
| SN-1F                   | Snail1 | 5'-GCGCCCGTCTCCTTCTCGTC-3'                                               |
| SN-1R                   | Snail1 | 5'-CTTCCGCGACTGGGGGTCT-3'                                                |
| SN-2F                   | SNAIL1 | 5'-TTCCAGCGCCCTACGACCAG-3'                                               |
| SN-2R                   | SNAIL1 | 5'-GCCTTCCCACTGTCTCATC-3'                                                |
| CA-1F                   | CA9    | 5'-ATCCACGTGGTTCACCTCAG-3'                                               |
| CA-1R                   | CA9    | 5'-CGATTCTTCCAAGCGAGAC-3'                                                |
| SDHA-1F                 | SDHA   | 5'-TGGAACAAGAGGGCATCTG-3'                                                |
| SDHA-1R                 | SDHA   | 5'-CCACCACTGCATCAAATTCATG-3'                                             |
| HP-1R                   | HPRT   | 5'-GGCCAGACTTTGTTGGATTTG-3'                                              |
| HP-1F                   | HPRT   | 5'-TGCGCTCATCTTAGGCTTTGT-3'                                              |

**Sequence of the oligonucleotides used in this article.** The different uses of these oligonucleotides are indicated in Methods.
